# Supplementary material for: Polyethylenes functionalized with ureidopyrimidone: synthesis, thermomechanical properties and shape memory behavior
Source: Royal Society of Chemistry journal article supplement (doi:10.1039/d1py00625h), 2021-01-01
Supplement: d1py00625h1.pdf [file d1py00625h1.pdf]

## SUPPORTING INFORMATION

### **Polyethylenes Functionalized with Ureidopyrimidone: Synthesis, Thermomechanical Properties and Shape Memory Behavior**

Honggang Mei, Bingjie Zhao, Huaming Wang, Lei Li, Sixun Zheng\*

College of Chemistry and Chemical Engineering and the State Key Laboratory of Metal Matrix Composites, Shanghai Jiao Tong University, Shanghai 200240, P. R. China

## TABLE OF CONTENTS

### **1. Measurements and Characterization**

|                                                          |    |
|----------------------------------------------------------|----|
| 1.1. Nuclear Magnetic Resonance (NMR).....               | S2 |
| 1.2. Size Exclusion Chromatography (SEC).....            | S2 |
| 1.3. Fourier Transform Infrared (FTIR) Spectroscopy..... | S2 |
| 1.4. Differential Scanning Calorimetry (DSC).....        | S2 |
| 1.5. Wide Angle X-ray Diffraction (WXR).....             | S3 |
| 1.6. Rheological Measurements.....                       | S3 |
| 1.7. Tensile Tests.....                                  | S3 |
| 1.8. Shape Memory Tests.....                             | S3 |
| 1.9. Stress Relaxation Tests.....                        | S4 |

|                        |           |
|------------------------|-----------|
| <b>2. Schemes.....</b> | <b>S5</b> |
|------------------------|-----------|

|                       |           |
|-----------------------|-----------|
| <b>3. Tables.....</b> | <b>S6</b> |
|-----------------------|-----------|

|                        |           |
|------------------------|-----------|
| <b>4. Figures.....</b> | <b>S9</b> |
|------------------------|-----------|

---

\* Corresponding author, email: [szheng@sjtu.edu.cn](mailto:szheng@sjtu.edu.cn) (S. Zheng)

## 1. Measurement and Characterization

### 1.1 Nuclear Magnetic Resonance (NMR)

The  $^1\text{H}$  NMR and  $^{13}\text{C}$  NMR spectroscopy was carried out on a Bruker AVANCE 500 (500 MHz) spectrometer. The PHEE sample dissolved in  $\text{DMSO-}d_6$  was measured at 25 °C; the PCOE-OH samples dissolved in toluene- $d_8$  was measured at 25 °C. For the PE-OHs, the samples were dissolved in toluene- $d_8$  and then measured at 80 °C. The values of  $^1\text{H}$  NMR and  $^{13}\text{C}$  NMR chemical shift are expressed with reference to the residual solvent peak at 2.50 ppm of the deuterium DMSO or 2.13 ppm of the deuterium toluene.

### 1.2 Size Exclusion Chromatography (SEC)

The molar mass of PHEE was measured on a Waters 1515 gel permeation chromatography (GPC) system equipped with three Waters RH columns (*i.e.*, RH1, RH3 and RH4) and a refract index detector at 80 °C. *N,N'*-Dimethylformamide (DMF) containing 0.01 mol  $\times$  L $^{-1}$  lithium bromide (LiBr) was used as the eluent at a flow rate of 1.0 mL  $\times$  min $^{-1}$ . The molar mass values of PCOE-OHs were measured on a HLC-8320GPC instrument equipped with TSK gel GMHXL column (7.8 ID  $\times$  30 CM, 9  $\mu\text{m}$ ) and a refract index detector at 40 °C. Tetrahydrofuran was used as the eluent at a flow rate of 1.0 mL  $\times$  min $^{-1}$ . The solutions were passed through a 0.22  $\mu\text{m}$  PTFE filter prior to injection, and the molar mass values were expressed relative to polystyrene standards.

### 1.3 Fourier Transform Infrared (FTIR) Spectroscopy

The FTIR spectroscopy was carried out on a Perkin Elmer 1000 Spectrometer at room temperature. The solutions of PHEE and PCOE-OH dissolved in tetrahydrofuran were casted on the KBr windows. The films of PE-OH and PE-UPy were sufficiently thin so that Lambert-beer law was followed. The spectra were recorded at the resolution of 2  $\text{cm}^{-1}$  with 64 scans.

### 1.4 Differential Scanning Calorimetry (DSC)

The DSC measurements were performed on a TA Instruments Q2000 equipped with a RCS 90 cooling system. About 8 ~ 10 mg of sample was put in an aluminum pan and then subjected to DSC measurements under a nitrogen atmosphere. All the samples were heated up to 150 °C and held at this temperature for 3 min and then quenched to -40 °C. The samples were heated from -40 to 160 °C at a heating rate of 20 °C × min<sup>-1</sup> and then cooled at a cooling rate of 10 °C × min<sup>-1</sup>.

### *1.5 Wide Angle X-ray Diffraction (WXR)*

The wide-angle X-ray diffraction (XRD) experiments were carried out on a Shimadzu XRD-6000 X-ray diffractometer with Cu K $\alpha$  ( $\lambda = 0.154$  nm) irradiation at 40 kV and 40 mA using a Ni filter. Data were recorded in the range of  $2\theta = 5 \sim 40^\circ$  at the scanning rate of 6.0 ° × min<sup>-1</sup>, respectively.

### *1.6 Rheological Measurements*

The specimens for rheological measurements were prepared with disk-like flakes with the sizes of 25 mm in diameter and 1 mm in thickness. The tests were performed on a TA Instruments DHR-2 rheometer equipped with the parallel plates. The measurements were conducted with a frequency sweep from 0.01 to 100 Hz at 150 °C. The temperature scans were carried from 150 to 200 °C at the frequency of 1 Hz.

### *1.7 Tensile Tests*

The tensile tests were performed on a WDW-2 electron universal testing machine equipped with a 2000 N load cell. Dumb bell-shaped specimens were machined with the dimension of 12 mm in length and 2 mm in width and 0.6 mm in thickness. The specimens were uniaxially stretched with the speed of 50 mm × min<sup>-1</sup>. For each sample, at least five parallel tests were conducted and the parameters of mechanical properties were reported as the averages of five successful tests.

### *1.8 Shape Memory Tests*

The one-way cyclic shape memory tests were performed on a DMTA-Q800 apparatus. First, the specimens were heated up to 150 °C with the speed of 3 °C × min<sup>-1</sup> and then stretched at 150 °C at the loading rate of 4.0 KPa × min<sup>-1</sup>. Keeping the load, the specimen was cooled to 50 °C at the rate of 3 °C × min<sup>-1</sup> to fix the temporary shape. At 50 °C, the load was lifted and the specimen was heated up to 150 °C at the rate of 3 °C × min<sup>-1</sup>. In all these steps, the change in strain was recorded as functions of temperature and stretching load. Shape fixity (F) was defined by eq. S1:

$$F = \frac{\varepsilon_f(N)}{\varepsilon_s} \times 100\% \quad (\text{S1})$$

where  $\varepsilon_f$  is the strain of the fixed temporary shape after removing the stress,  $\varepsilon_s$  is the strain after the specimen was stretched and before the stress was removed, and  $N$  is the cycle number. Recovery (R) was defined by eq. S2:

$$R = \frac{\varepsilon_s - \varepsilon_r(N)}{\varepsilon_s - \varepsilon_r(N-1)} \times 100\% \quad (\text{S2})$$

where  $\varepsilon_r$  is the residual strain of the specimen at the completion of the one-way shape memory cycle.

**Reference:** Behl, M.; Lendlein A. “*Shape-memory Polymers*” *Mater. Today* **2007**, *10*, 20~28

### 1.9 Stress Relaxation Tests

The stress relaxation tests were carried out on a TA Instruments DMA Q800 system; the strain value was set as  $\varepsilon = 15\%$  at 170 °C.

## SCHEMES

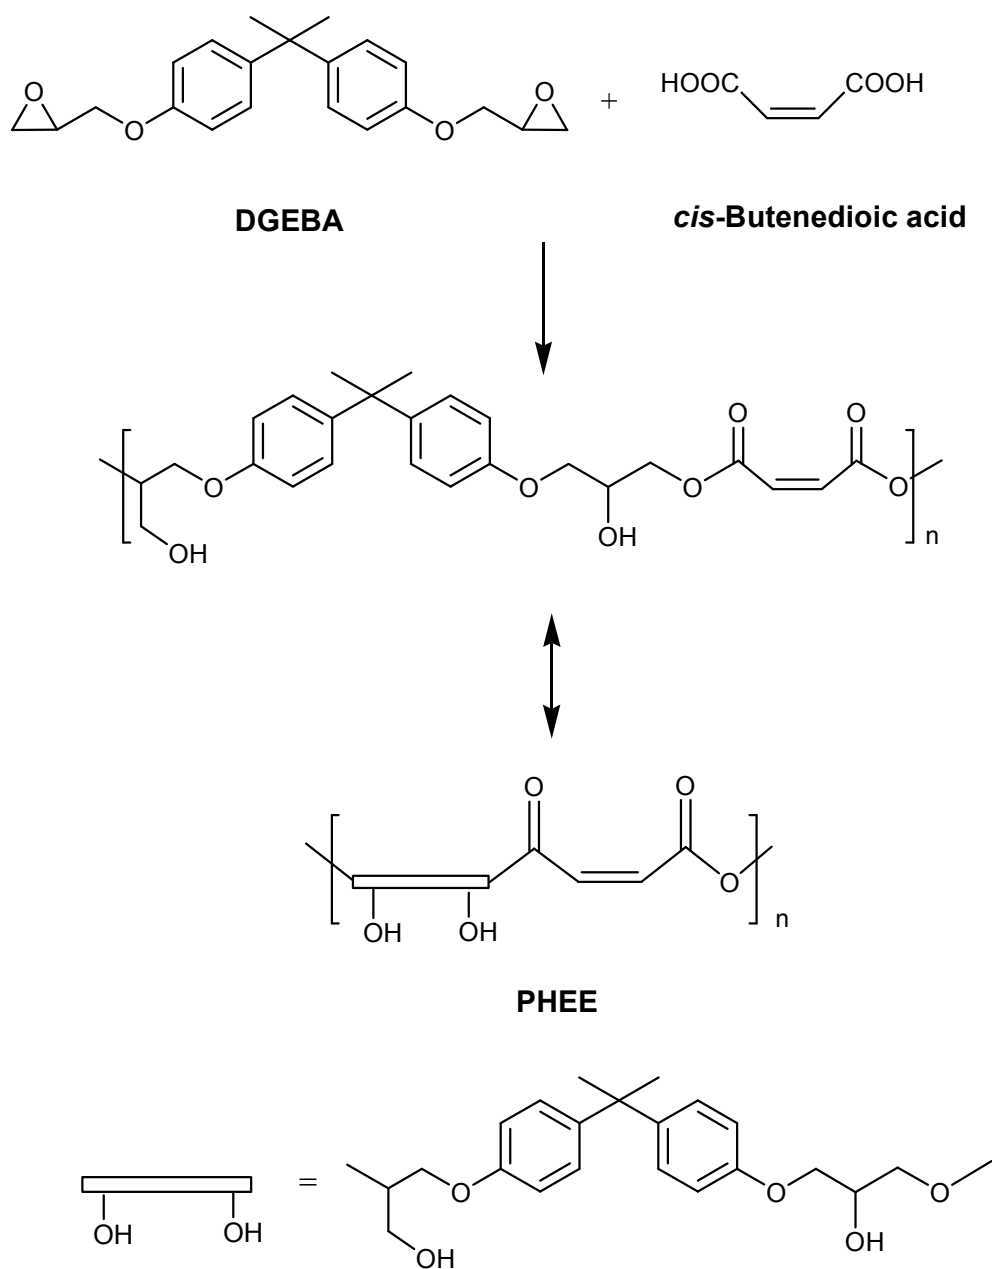

**Scheme S1** Synthesis of PHEE (macro-CTA)

## TABLES

**Table S1** Thermal properties of PE-OH and PE-UPy samples

| Samples*             | $\Delta H_m$ (J $\times$ g $^{-1}$ ) | $\Delta H_c$ (J $\times$ g $^{-1}$ ) | Samples*              | $\Delta H_m$ (J $\times$ g $^{-1}$ ) | $\Delta H_c$ (J $\times$ g $^{-1}$ ) |
|----------------------|--------------------------------------|--------------------------------------|-----------------------|--------------------------------------|--------------------------------------|
| PE <sub>5</sub> -OH  | 164.5                                | 168.9                                | PE <sub>10</sub> -UPy | 164.1                                | 171.2                                |
| PE <sub>8</sub> -OH  | 162.5                                | 168.1                                | PE <sub>15</sub> -UPy | 155.7                                | 161.9                                |
| PE <sub>11</sub> -OH | 158.4                                | 162.8                                | PE <sub>21</sub> -UPy | 152.9                                | 157.1                                |
| PE <sub>14</sub> -OH | 148.8                                | 154.2                                | PE <sub>26</sub> -UPy | 143.3                                | 147.9                                |
| PE <sub>20</sub> -OH | 137.0                                | 140.6                                | PE <sub>35</sub> -UPy | 123.6                                | 127.9                                |

\*: The digits behind “PE” represent the weight percentage of HEE and/or HEE(UPy)

**Table S2** Mechanical properties of PE and PE-OH samples

| <b>Samples*</b>      | <b>Tensile strength (MPa)</b> | <b>Elongation at break (%)</b> | <b>Modulus (MPa)</b> |
|----------------------|-------------------------------|--------------------------------|----------------------|
| Plain PE             | 26.7 ± 2.2                    | 866 ± 125                      | 287 ± 30             |
| PE <sub>5</sub> -OH  | 28.3 ± 2.3                    | 760 ± 120                      | 329 ± 26             |
| PE <sub>8</sub> -OH  | 27.0 ± 2.1                    | 650 ± 103                      | 376 ± 21             |
| PE <sub>11</sub> -OH | 26.0 ± 2.4                    | 552 ± 72                       | 347 ± 31             |
| PE <sub>14</sub> -OH | 20.6 ± 2.5                    | 450 ± 81                       | 363 ± 43             |
| PE <sub>20</sub> -OH | 19.0 ± 1.9                    | 257 ± 78                       | 318 ± 29             |

\*: The digits behind “PE” represent the weight percentage of HEE and/or HEE(UPy)

**Table S3** Mechanical properties of PE and PE-UPy samples

| <b>Samples*</b>       | <b>Tensile strength (MPa)</b> | <b>Elongation at break (%)</b> | <b>Modulus (MPa)</b> |
|-----------------------|-------------------------------|--------------------------------|----------------------|
| Plain PE              | 26.7 ± 2.2                    | 866 ± 125                      | 287 ± 30             |
| PE <sub>10</sub> -UPy | 31.7 ± 2.1                    | 580 ± 105                      | 435 ± 33             |
| PE <sub>15</sub> -UPy | 32.2 ± 2.7                    | 450 ± 85                       | 459 ± 41             |
| PE <sub>21</sub> -UPy | 26.0 ± 2.3                    | 83 ± 20                        | 470 ± 23             |

|                       |            |         |          |
|-----------------------|------------|---------|----------|
| PE <sub>26</sub> -UPy | 22.7 ± 1.7 | 38 ± 11 | 454 ± 29 |
|-----------------------|------------|---------|----------|

|                       |            |        |          |
|-----------------------|------------|--------|----------|
| PE <sub>35</sub> -UPy | 22.0 ± 2.0 | 15 ± 8 | 405 ± 39 |
|-----------------------|------------|--------|----------|

---

\*: The digits behind “PE” represent the weight percentage of HEE and/or EE(UPy)



**Table S4** Shape fixity ( $F$ ) of one-way shape memory cycle tests

| Samples               | Shape fixity ( $F$ ) (%) |       |       |       |       |
|-----------------------|--------------------------|-------|-------|-------|-------|
|                       | $N^*=1$                  | $N=2$ | $N=3$ | $N=4$ | $N=5$ |
| PE <sub>10</sub> -UPy | 98.5                     | 98.6  | 98.7  | 98.7  | 98.8  |
| PE <sub>21</sub> -UPy | 97.3                     | 97.6  | 97.7  | 97.7  | 97.8  |
| PE <sub>35</sub> -UPy | 95.9                     | 96.0  | 96.1  | 96.3  | 96.6  |

\* $N$  stands for cycle number

**Table S5** Shape recovery ( $R$ ) of one-way shape memory cycle tests

| Samples               | Shape recovery ( $R$ ) (%) |       |       |       |       |
|-----------------------|----------------------------|-------|-------|-------|-------|
|                       | $N^*=1$                    | $N=2$ | $N=3$ | $N=4$ | $N=5$ |
| PE <sub>10</sub> -UPy | 12.3                       | 56.3  | 62.1  | 66.4  | 68.9  |
| PE <sub>21</sub> -UPy | 29.8                       | 74.4  | 80.4  | 82.8  | 84.9  |
| PE <sub>35</sub> -UPy | 32.8                       | 75.3  | 80.2  | 85.0  | 86.3  |

\* $N$  stands for cycle number

## FIGURES

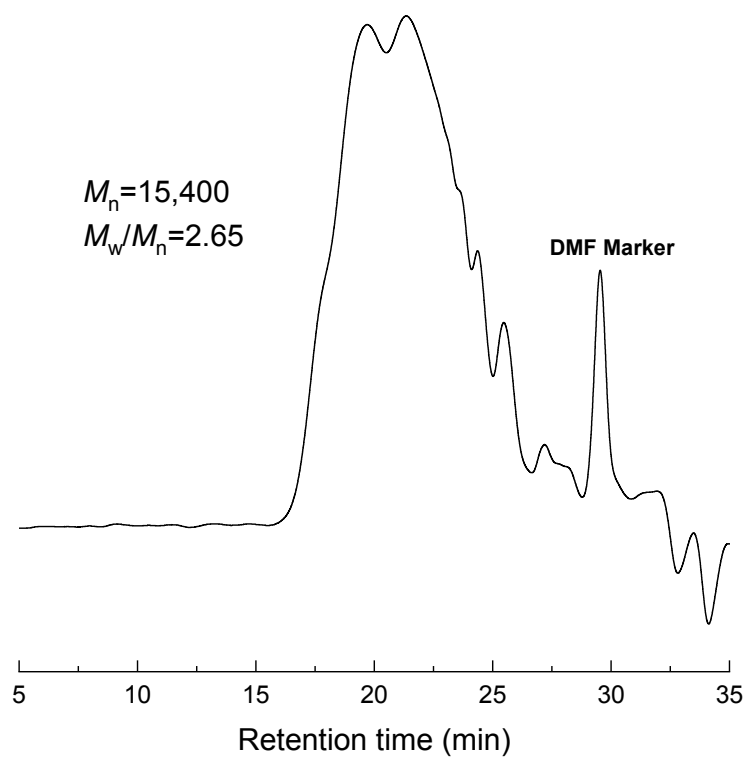

**Figure S1** SEC curve of PHEE (macro-CTA)

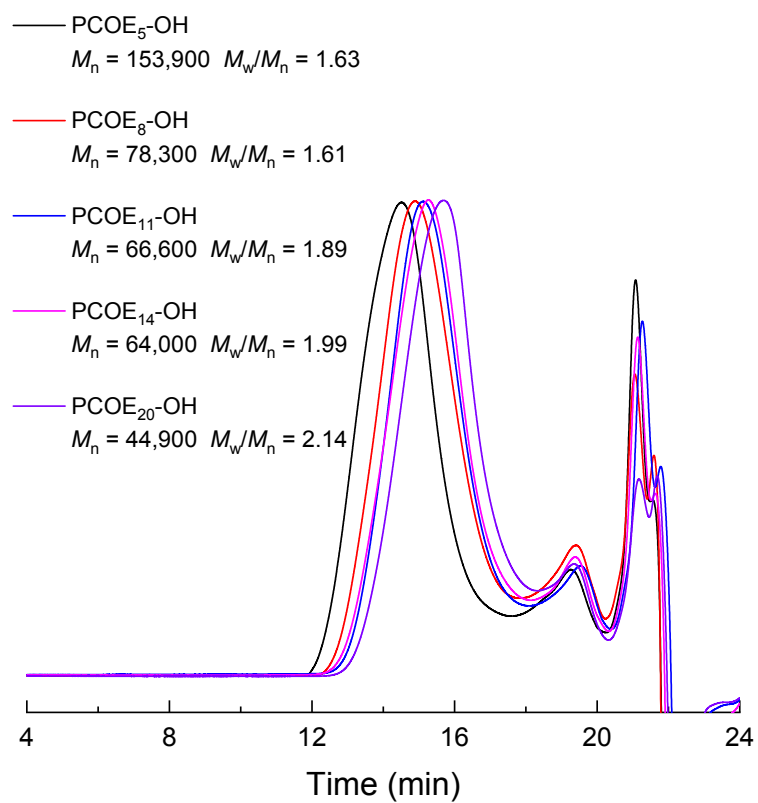

**Figure S2** SEC curves of PCOE-OHs with various content of HEE

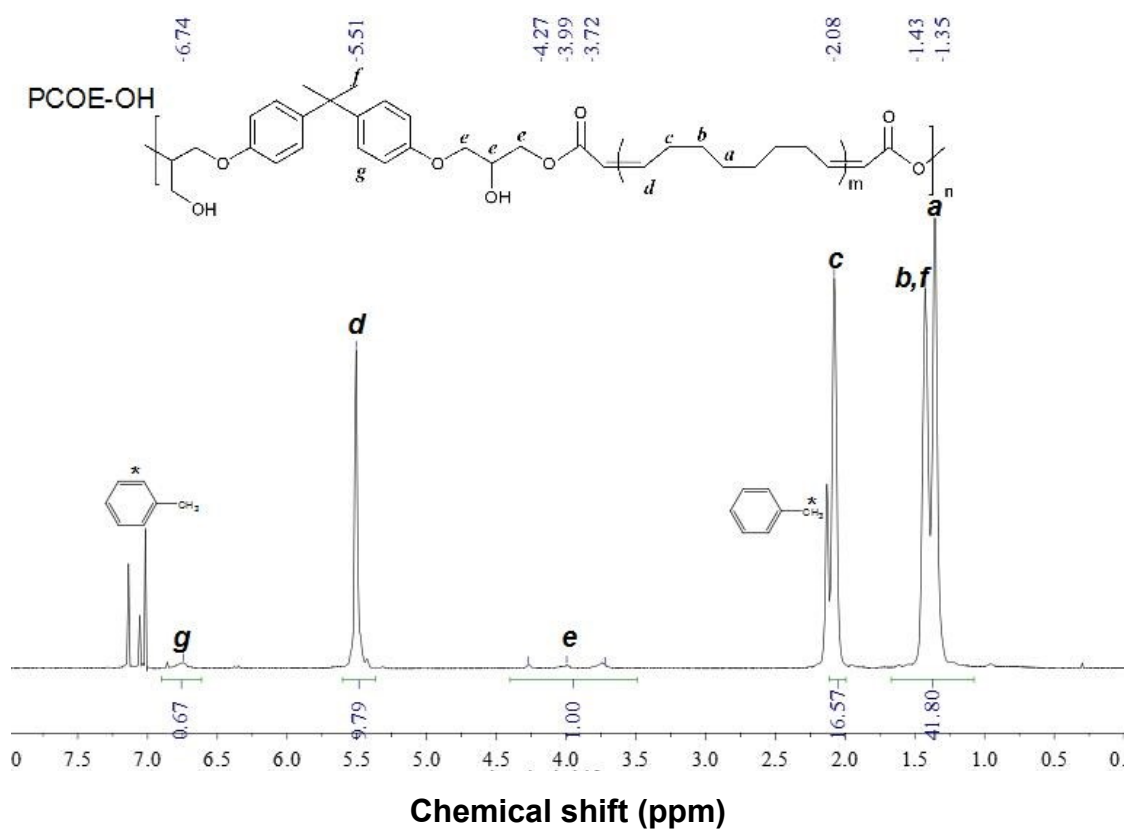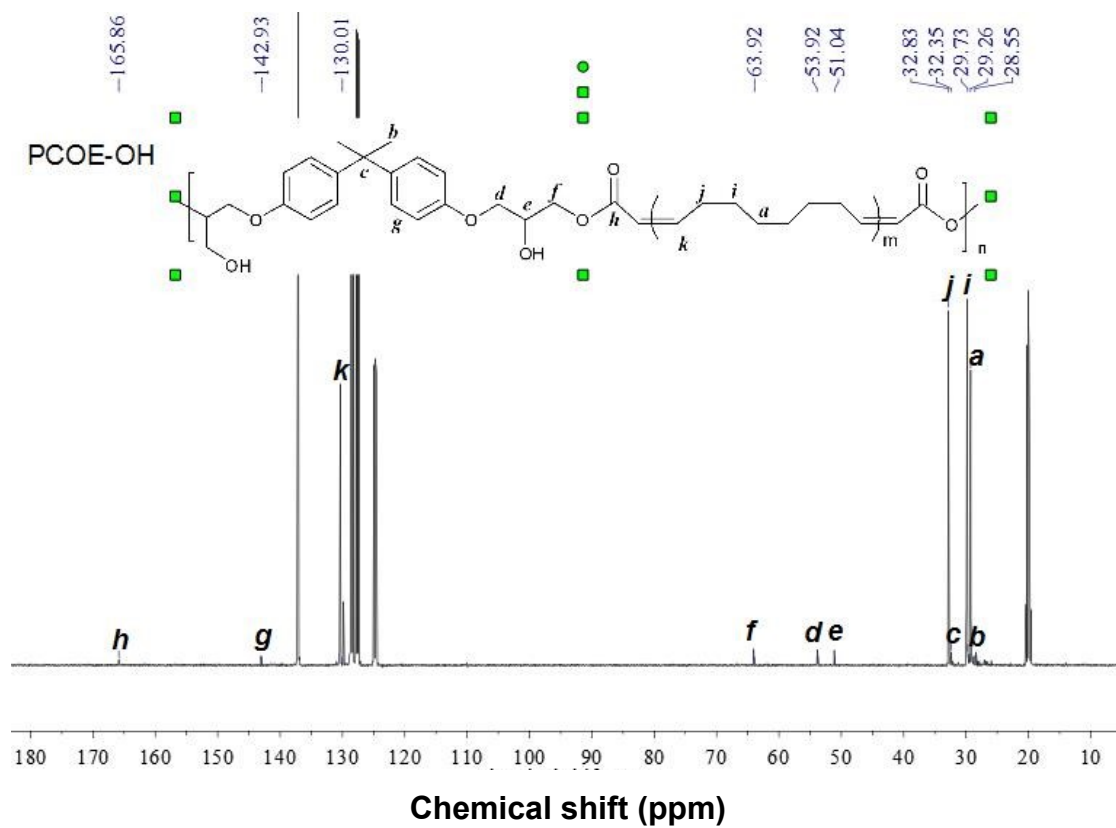

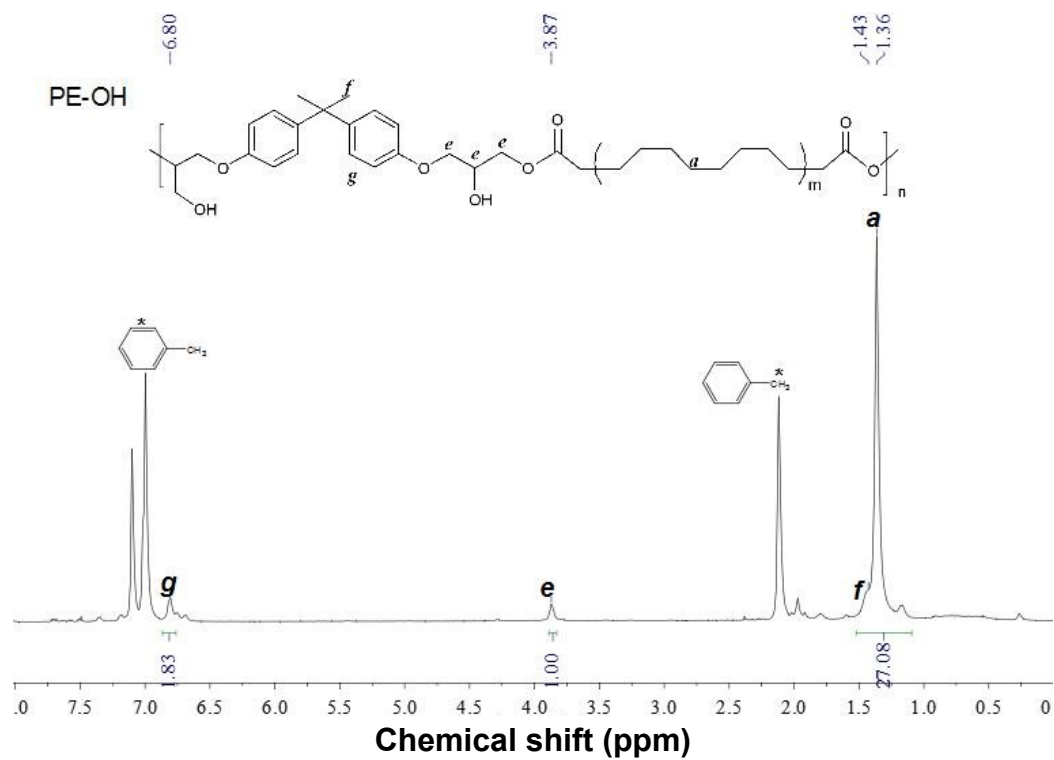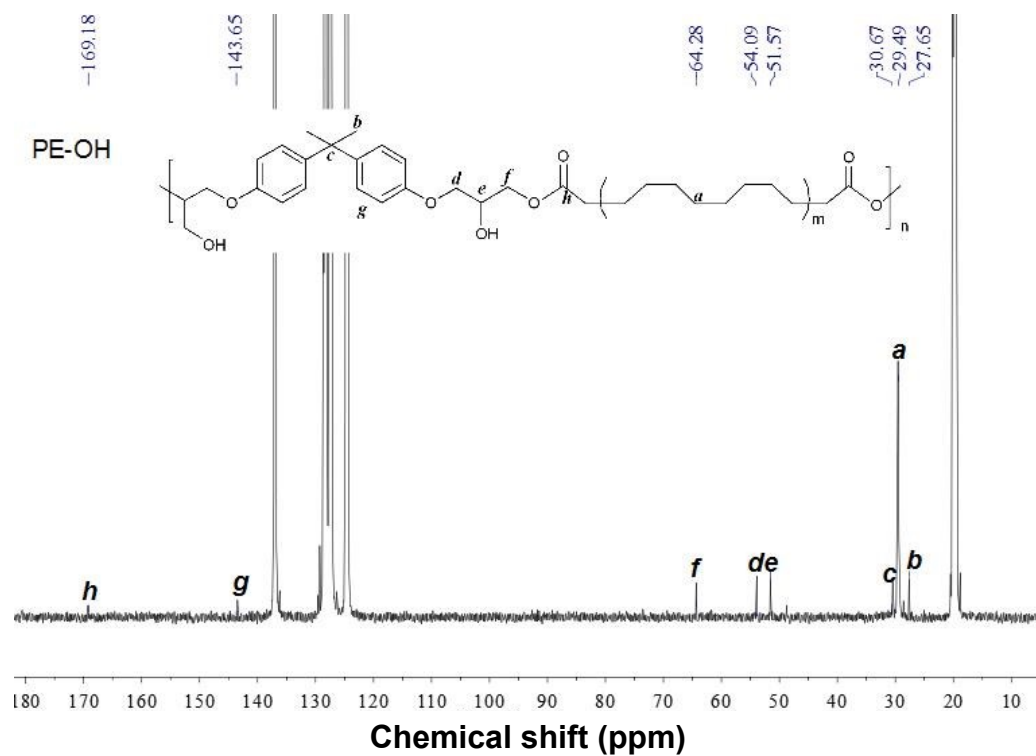

**Figure S3**  $^1\text{H}$  NMR and  $^{13}\text{C}$  NMR spectra of PCOE-OH and PE-OH in toluene- $d_8$ . The spectra of PCOE-OH were measured at 25 °C whereas those of PE-OH at 80 °C.

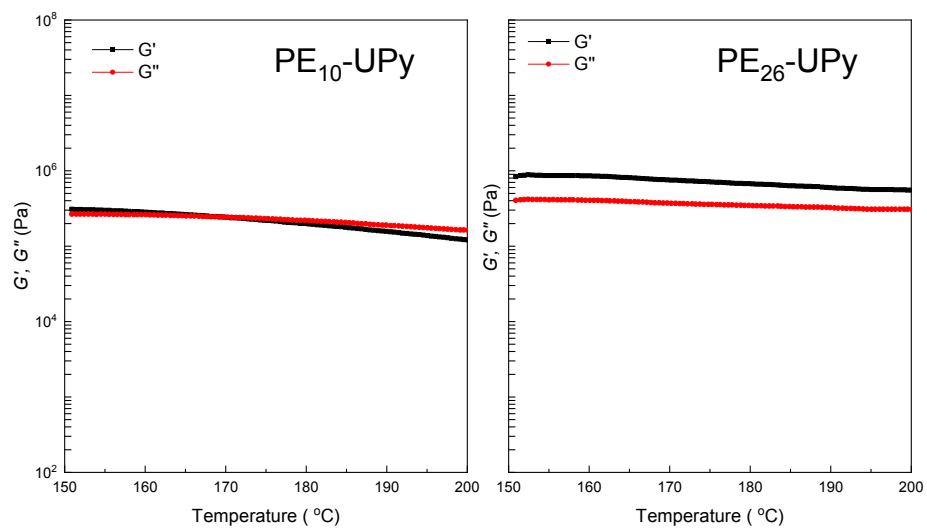

**F**

**figure S4** Plots of  $G'$  and  $G''$  as a function of temperature in the rheological measurements for PE<sub>10</sub>-UPy and PE<sub>26</sub>-UPy at 1 Hz

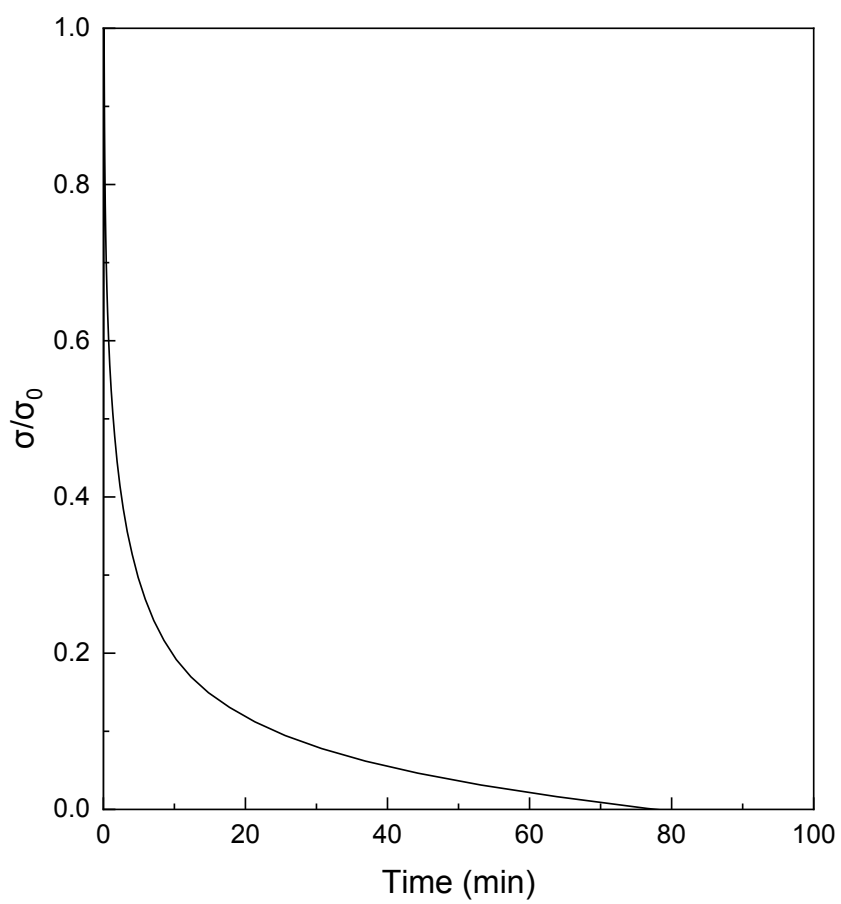

**figure S5** Stress relaxation curve of PE<sub>35</sub>-UPy at 170 °C

**F**
